# Supplementary material for: Molecular insight into isoform specific inhibition of PI3K-α and PKC-η with dietary agents through an ensemble pharmacophore and docking studies
Source: PubMed Central journal article supplement (PMC8190100; doi:10.1038/s41598-021-90287-3), 2021-06-09
Supplement: 41598_2021_90287_MOESM1_ESM.pdf [file 41598_2021_90287_MOESM1_ESM.pdf]

## Supporting information

### **Molecular insight into isoform specific inhibition of PI3K- $\alpha$ and PKC- $\eta$ with dietary agents through an ensemble pharmacophore and docking studies**

Baki Vijaya Bhaskar<sup>1\*</sup>, Aluru Rammohan<sup>2</sup>, Tirumalasetty Munichandra Babu<sup>3</sup>, Gui Yu Zheng<sup>1</sup>, Weibin Chen<sup>1</sup>, Rajendra Wudayagiri<sup>4</sup>, Grigory V. Zyryanov<sup>2</sup>, Wei Gu<sup>1\*</sup>

<sup>1</sup>Department of Pathophysiology, The Key Immunopathology Laboratory of Guangdong Province, Shantou University Medical College, Shantou, Guangdong, China-515031.

<sup>2</sup>Department of organic and biomolecular chemistry, Ural Federal University, Ekaterinburg 620002, Russia.

<sup>3</sup>Department of Physiology, Shantou University Medical College, Shantou, Guangdong, China-515031.

<sup>4</sup>Department of Zoology, Sri Venkateswara University, Tirupati, Andhra Pradesh-517502.

\*Correspondence: vijaybio08@gmail.com, [weigu@stu.edu.cn](mailto:weigu@stu.edu.cn)

## FIGURE

a).

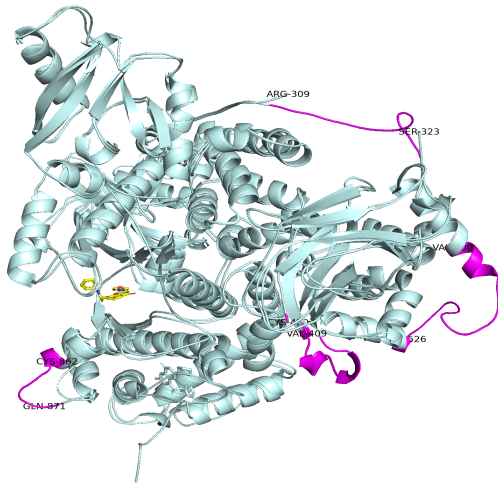

b).

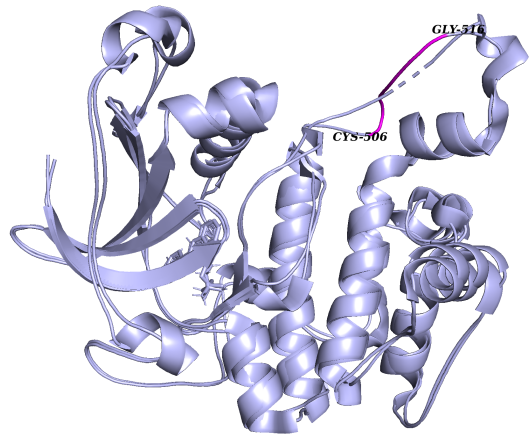

**Figure S1.** Overlays of modeled structures of **a).** PI3K- $\alpha$  and **b).** PKC- $\eta$  with missing regions of crystal structures. Missing regions are marked in magenta with labeling.

PI3K- $\alpha$

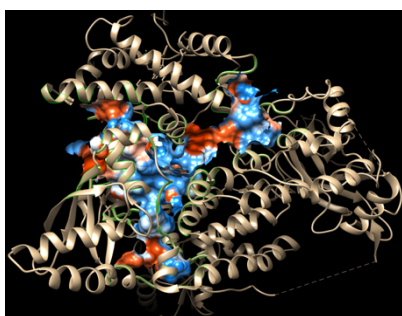

PKC- $\eta$

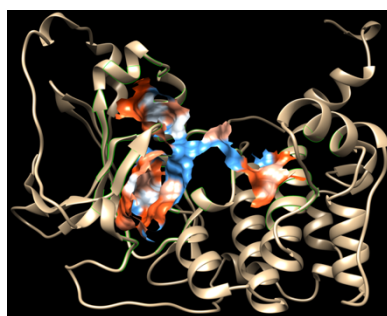

Ras

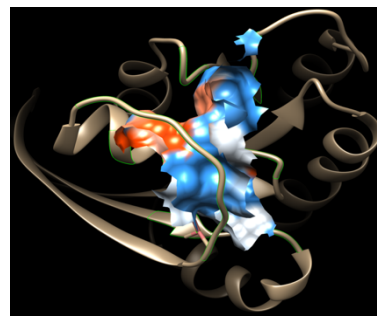

H-Ras

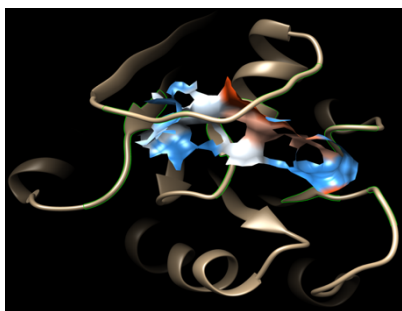

AKT-1

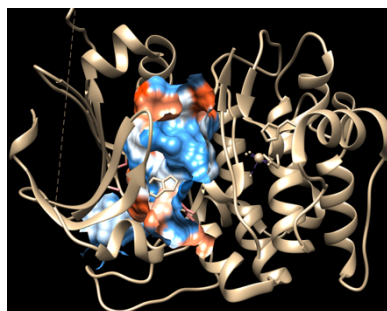

MEKK3

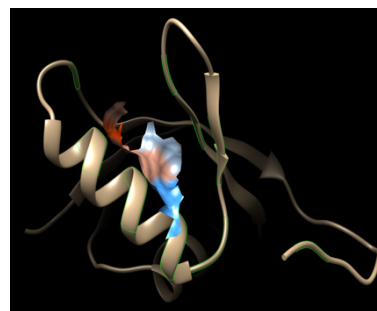

NF $\kappa$ B

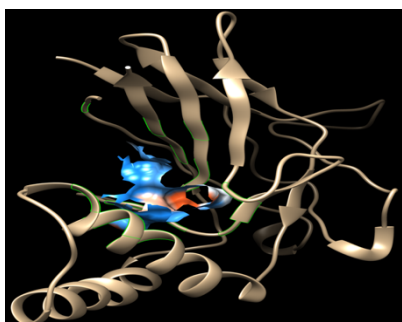

MEKK2b

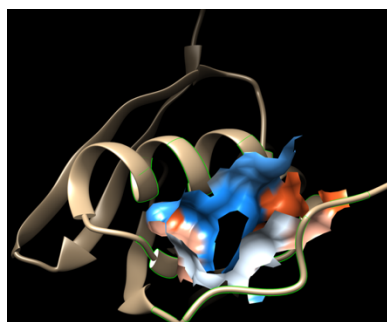

TRAF2

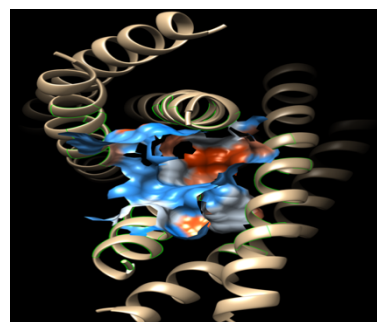

**Figure S2.** The shapes of the binding pocket cavity and surface area (SA) of molecular targets were analyzed using CASTp Server.

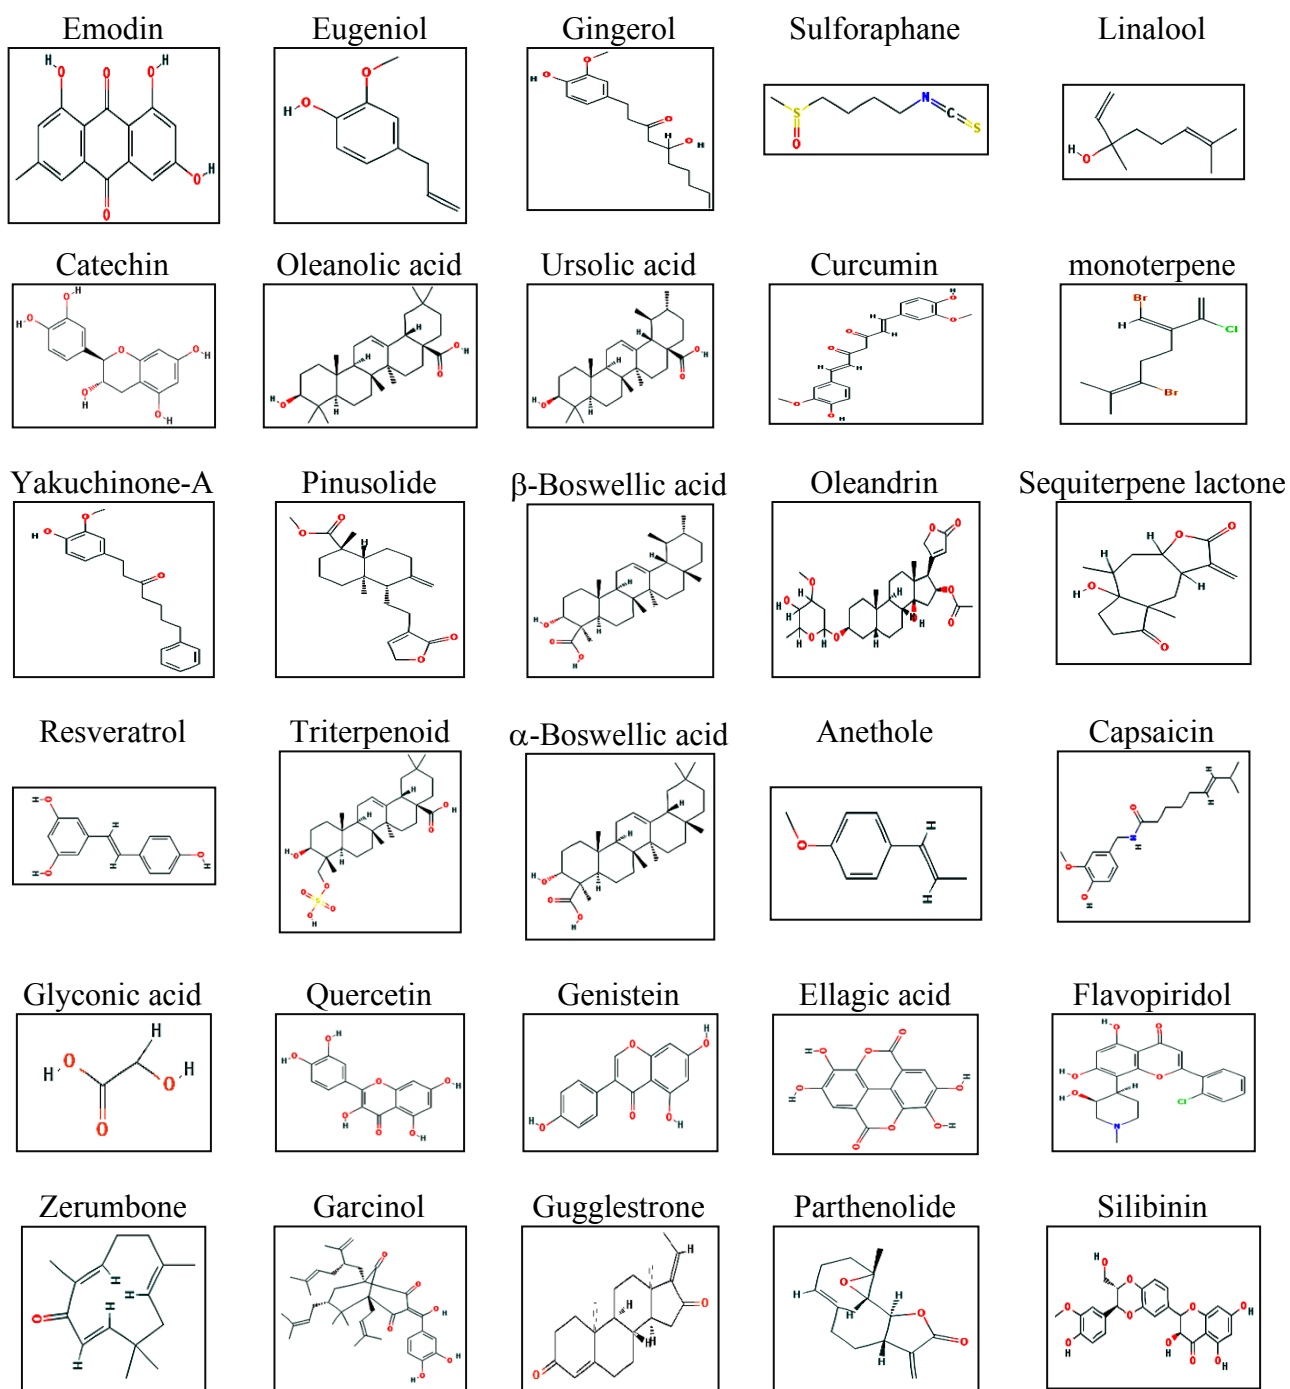

**Figure S3.** 2D structures of dietary compounds were retrieved from PubChem.

a).

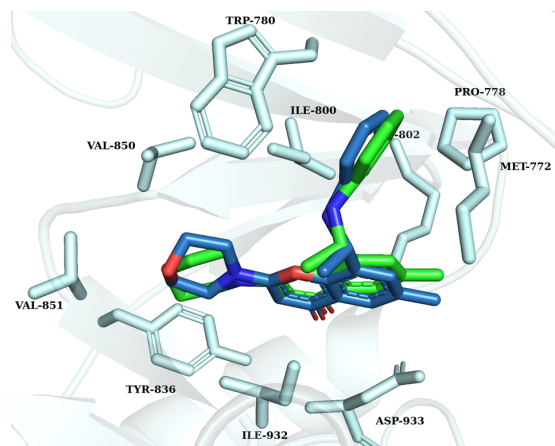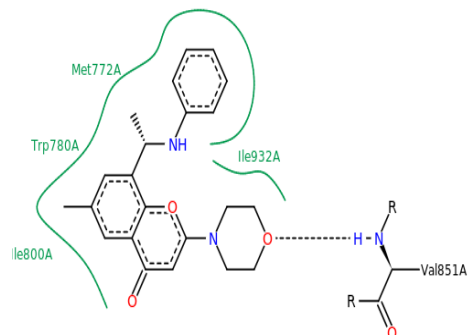

b).

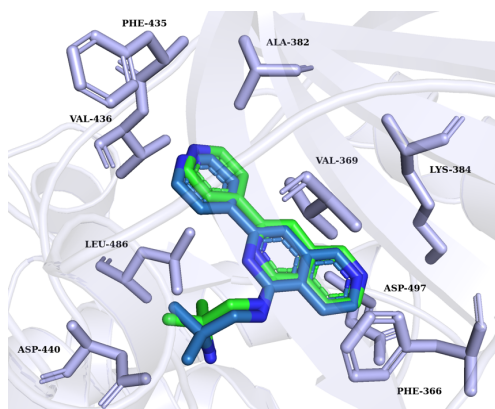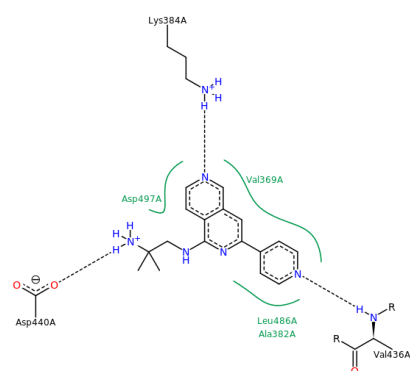

**Figure S4.** a). Overlays of crystal ligand PIK-108 (green) and docked pose in the ATP binding pocket of PI3K- $\alpha$  (p110 $\alpha$ ) and b). Overlays of cocystal ligand 07U (green) and docked pose (blue) in the binding pocket of PKC- $\eta$ .

Target

Compounds

Silibinin

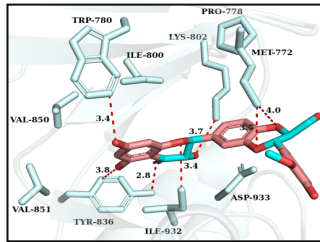

Flavopiridol

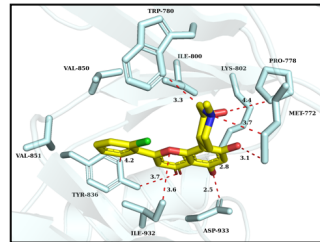

Oleandrin

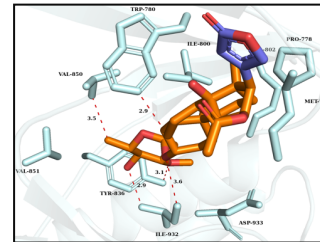

Ursolic acid

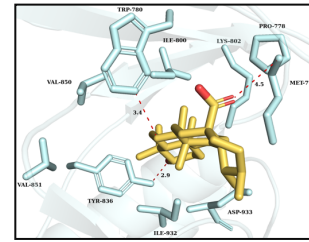

α-Boswellic acid

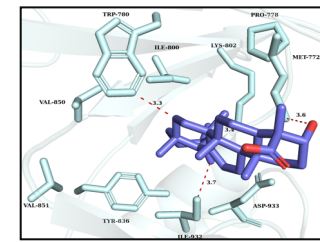

PI3K-α

β-Boswellic acid

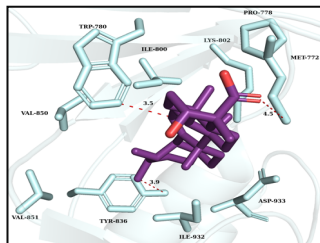

Triterpenoid

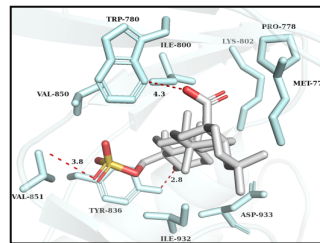

Guggulesterone

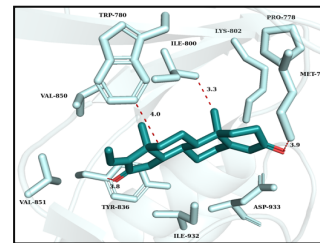

Oleanolic acid

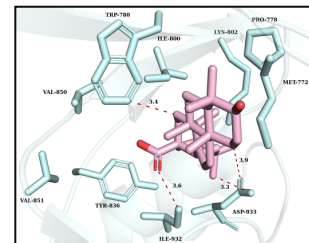

Silibinin

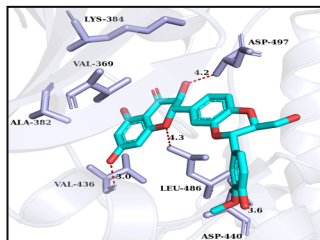

Flavopiridol

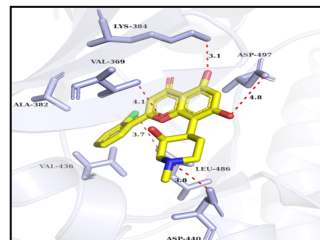

Oleandrin

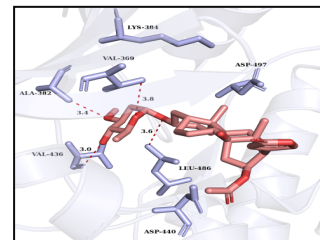

Ursolic acid

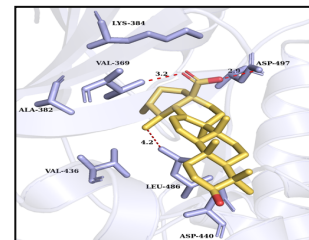

Emodin

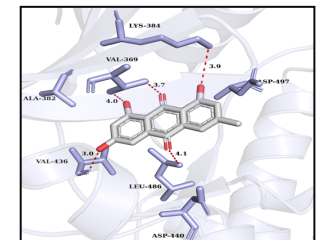

PKC-η

Ellagic acid

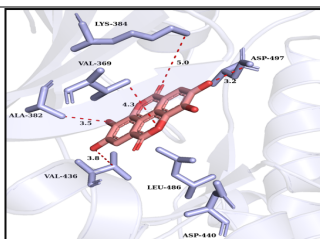

Silibinin

Flavopiridol

Oleandrin

$\alpha$ -Boswellic acid

Ras

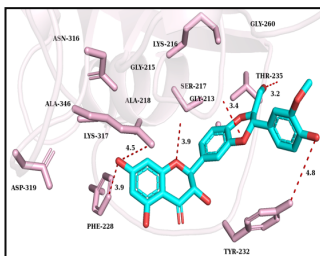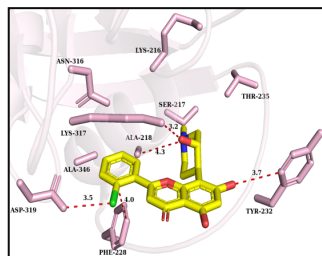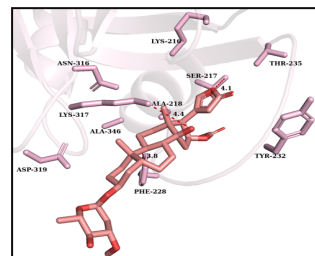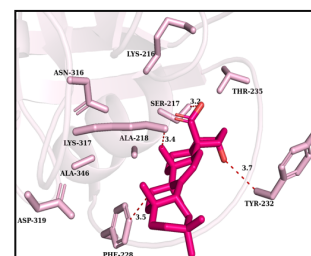

Silibinin

H-Ras

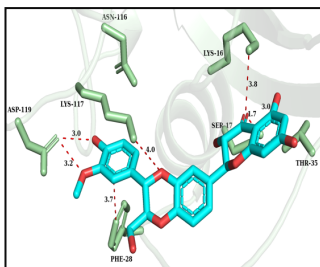

**Figure S5.** 3D orientation and binding interactions of the best docked dietary agents with active site residues of PI3K- $\alpha$ , PKC- $\eta$ , Ras and H-Ras. Proteins are shown in the cartoon and key residues are represented sticks with labelling in the binding cavity. Binding interactions are indicated in red dotted lines with distances ( $\text{\AA}$ ).

| Target                                                           | Dietary compound                                                                         |                         |                           |                           |                                               |                   |
|------------------------------------------------------------------|------------------------------------------------------------------------------------------|-------------------------|---------------------------|---------------------------|-----------------------------------------------|-------------------|
| PI3K- $\alpha$<br>and<br>crystal<br>ligand<br>PIK-108<br>(green) | <b>Silibinin</b><br>                                                                     | <b>Flavopiridol</b><br> | <b>Oleandrin</b><br>      | <b>Ursolic acid</b><br>   | <b><math>\alpha</math>-Boswellic acid</b><br> |                   |
|                                                                  | <b><math>\beta</math>-Boswellic acid</b><br>                                             | <b>Triterpenoid</b><br> | <b>Guggulesterone</b><br> | <b>Oleanolic acid</b><br> |                                               |                   |
|                                                                  | <b>PKC-<math>\eta</math></b><br>and<br>crystal<br>ligand<br>naphthyri<br>dine<br>(green) | <b>Silibinin</b><br>    | <b>Flavopiridol</b><br>   | <b>Oleandrin</b><br>      | <b>Ursolic acid</b><br>                       | <b>Emodin</b><br> |



---

Ellagic acid

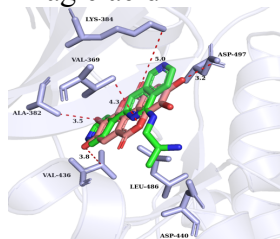

---

Ras  
and ATP

Silibinin

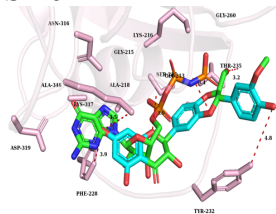

Flavopiridol

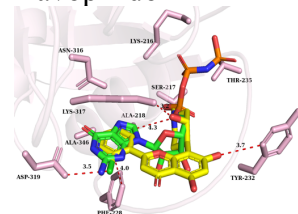

Oleandrin

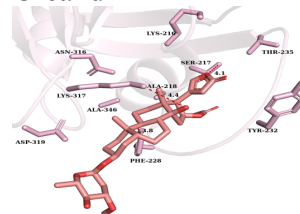

$\alpha$ -Boswellic acid

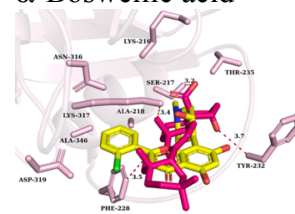

---

H-Ras  
and ATP

Silibinin and ATP

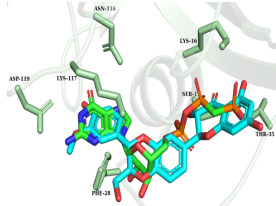

---

**Figure S6.** Overlay of the best docked dietary agents with reference ligands in binding pockets of cancer drug targets.

A.

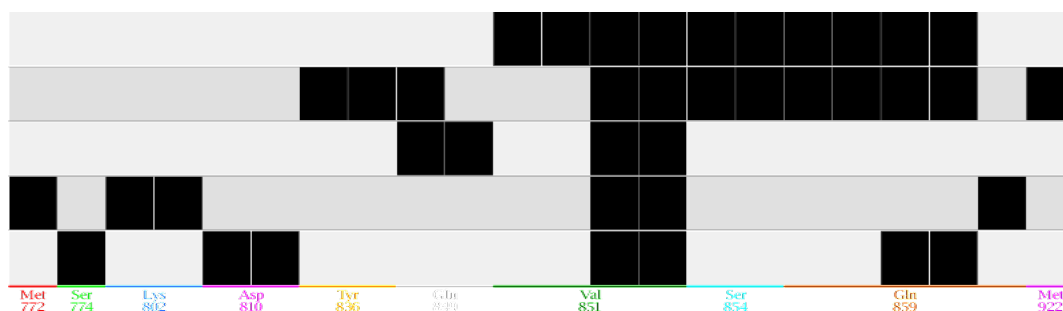

B.

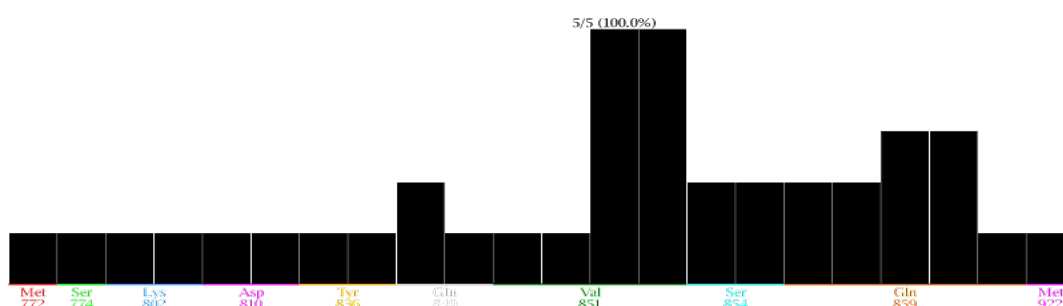

C.

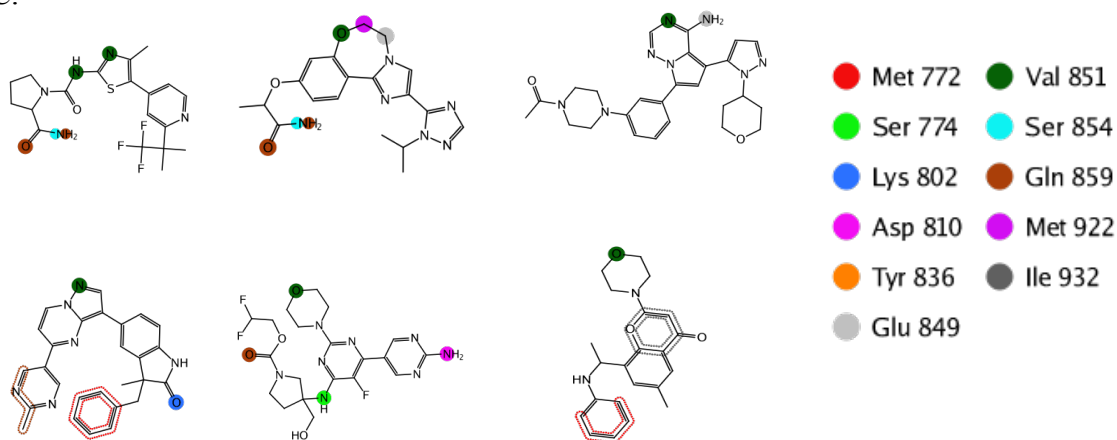

**Figure S7.** The PLIF computed the interactions between the PI3K- $\alpha$ -ligand complexes. **A).** The barcode representation of fingerprint of the PI3K- $\alpha$ -ligand complexes: The x-axis displays a three-letter code of the key residues and the y-axis shows the number of PI3K- $\alpha$ -ligand complexes. **B).** Population mode refers to the histogram of fingerprint of the PI3K- $\alpha$ -ligand complexes which showing the number of ligands with which each residue interacts. **C).** This display 2D depictions of the ligands. The colour highlights of the ligands correspond to the interactions shown in the barcodes and population modes. Notices that all interactions with a single protein residue will have the same colour in all the display modes.

A.

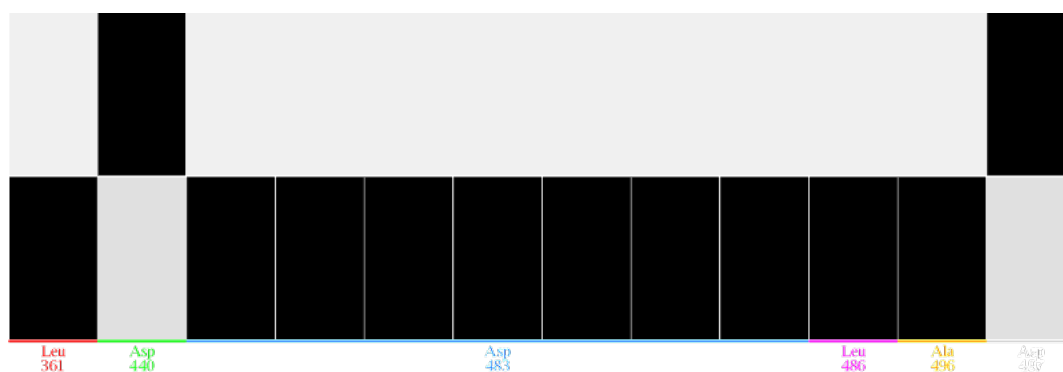

B.

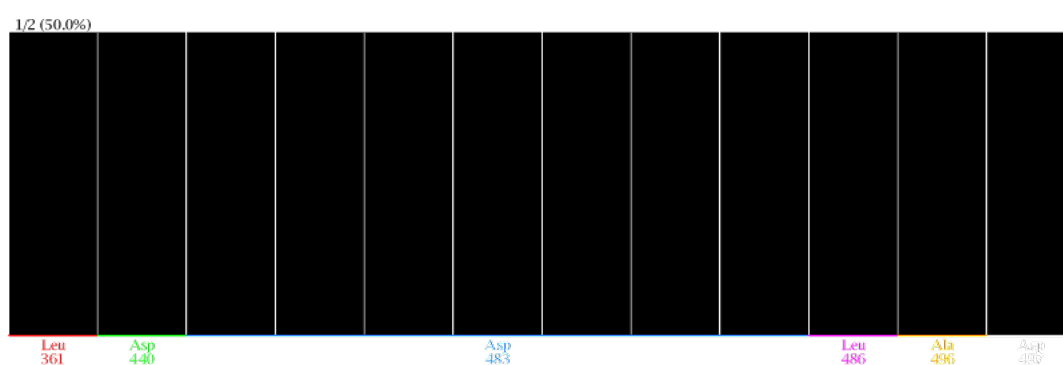

C.

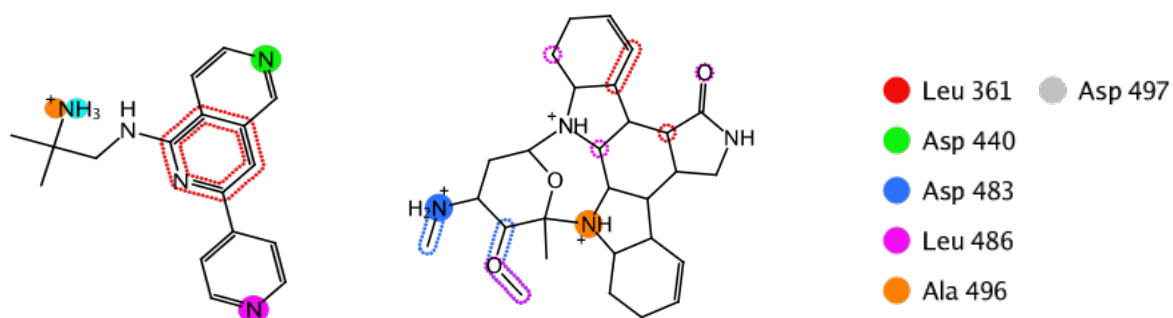

**Figure S8.** The PLIF computed the interactions between the PKC- $\eta$ -ligand complexes. **A).** The barcode representation of fingerprint of the PKC- $\eta$ -ligand complexes: The x-axis displays a three-letter code of the key residues and the y-axis shows the number of PKC- $\eta$ -ligand complexes. **B).** Population mode refers to the histogram of fingerprint of the PKC- $\eta$ -ligand complexes which showing the number of ligands with which each residue interacts. **C).** This display 2D depictions of the ligands. The colour highlights of the ligands correspond to the interactions shown in the barcodes and population modes. Notices that all interactions with a single protein residue will have the same colour in all the display modes.

## TABLE

**Table S1.** Identification of missing regions in crystal structures of cancer drug targets using SEQATOMs. (missing residues were displayed in small case with red colour font with yellow background in the sequence).

| PDBID | Sequence                                                                                                                                                                                                                                                                                                                                                                                                                                                                                                                                                                                                                                                                                                                                                                                                                                                                                                                                                                                                                                                                                                                                                                            |
|-------|-------------------------------------------------------------------------------------------------------------------------------------------------------------------------------------------------------------------------------------------------------------------------------------------------------------------------------------------------------------------------------------------------------------------------------------------------------------------------------------------------------------------------------------------------------------------------------------------------------------------------------------------------------------------------------------------------------------------------------------------------------------------------------------------------------------------------------------------------------------------------------------------------------------------------------------------------------------------------------------------------------------------------------------------------------------------------------------------------------------------------------------------------------------------------------------|
| 4A55  | msyyhhhhhdypptnlyfggampmpprPSSGELWGIHLMPPRILVECLLPNGMIVTLECLREA<br>TLVTIKHELFRARKYPLHQLLQDETSYIFVSVTQEAEREEFFDETRRLCDLRLFPFLK<br>VIEPVGNRREEKILNREIGFVIGMPVCEFDMVKDPEVQDFRRNILNVCKEAVDLRDLNSP<br>HSRAMYVYPPNVESSPELPHIYNKLDKGQIIVVIVVIVSPNNDKQKYTLKINHDCVPE<br>QVIAEAIKTRSMMLLSEQLKLCVLEYQKYLKVCGCDEYFLEKYPLSQYKYRSCIM<br>LGRMPNMLMAKESLSQLPIDSFTMPSYSRristatpymngestKSLWVINSALRIKILCAT<br>YVNVNIRDIDKIYVRTGIYHGGEPLCDNVNTQRVPCSNPRWNEWLNLDIYIPDLPRAAR<br>LCLSICSVkgrkgakeehCPLAWGNINLFDYTDTLVSGKMALNLWPVPHGLEDLLNPIGVTG<br>SNPKETPCLELEFDWFSSVVKFPDMSVIEEHANWSVsreagfsyshtglsnrlardnelreNDKEQL<br>RALCTRDPLEITEQEKDFLWSHRHYCVTIPEILPKLLLSVKWNSRDEVAQMYCLVKD<br>WPPKPEQAMELLDCNYPDPMVRSFAVRCLKYLTDKLSQYLIQLVQVLKYEQYLDN<br>LLVRFLKALTNQRIGHFFFWHLKSEMHNKTVSQRFGLLLESYCRACGMYLKHLNR<br>QVEAMEKLINLTDILKQEKKDETKVQMKFLVEQMRQPDFMDALQGFLSPLNPAHQL<br>GNLRLIECRIMSSAKRPLWLNWENPDIMSELLFQNNIIFKNGDDLRODMITLQIRIME<br>NIWQNOGLDLRMLPYGCLSIGDCVGLIEVVRNSHTIMQIQCKggkgalQFNSTLHQWLK<br>DKNKGEIYDAIDLFRSCAGYCVATFILGIGDRHNSNIMVKDDGQLFHIDFGHFLDHK<br>KKKFGYKRERVPFVLTQDFLIVISKGAQEYTKTREFERFQEMCYKAYLAIRQHANLFIN<br>LFSMMLGSGMPELQSFDDIAYIRKTLALDKTEQEALEYFTKQMNDAAHHGGWTKMDWI<br>FHTikqhaln |
| 3TXO  | gpkesskegngigvnsnrngiDNFEFIRVLGKGSFGKVMARVKETGDLYAVKVLKDDVILQDD<br>DVECTMTEKRILSLARNHPFLTQLFCCFQTPDRLFFVMEFVNGGDLMFHIQKSRRFDEA<br>RARFYAAEIISALMFLHDKGIYRDLKLDNVLLDHEGHCKLADFGMCKEGICngvtatfcG<br>TPDYIAPEILQEMLYGPAVDWWAMGVLLYEMLCGHAPFEAENEDDLFEAILNDEVVY<br>PTWLHEDATGILKSFMTKNPTMRLGSLTQGGEHAILRHPFFKEIDWAQLNHRQIEPPFR<br>PRIKSREDVSNFDPDFIKKEEPVLXPIDEGHLPMINQDEFNRNFEYVSPelqp                                                                                                                                                                                                                                                                                                                                                                                                                                                                                                                                                                                                                                                                                                                                                                                                 |
| 1A3Q  | GPYLVIVEQPKQRGFRFRYGCCEGSPHGGLPGASSEKGRKTYPTVKICNYEGPAKIEVDL<br>VTHSDPPRAHAHSLVGKQCESELGICAVSVGPKDMTAQFNNLGVLHVTKKNMMGMTMIQ<br>KLQRQLRSRPOGLTEAEQRELEQAEKELKKVMDLSIVRLRFSALRSLPLKPVISQPIH<br>DSKSPGASNLKISRMDKTAGSVRGGEVYLLCDKVKQKDDIEVRFYEDDENGWQAFGD<br>FSPTDVHKQYAIVFRTPPYHKMKIERPVTVFLQLKRKRGGDVSDSKQFTYYP                                                                                                                                                                                                                                                                                                                                                                                                                                                                                                                                                                                                                                                                                                                                                                                                                                                                      |
| 1LFD  | MTEYKLVVVGAGGVGKSALTIQLIQNHFVDEYDPTIEDSYRKQVVIDGETCLLDILDTA<br>GQEEYSAMRDQYMRTEGEGFLCVFAINNTKSFEDIHQYREQIKRVKDSDDVPMVLVGN<br>KCDLAARTVESRQAQDLARSYGIPYIETSAKTRQGVEDAFYTLVREIRQHK                                                                                                                                                                                                                                                                                                                                                                                                                                                                                                                                                                                                                                                                                                                                                                                                                                                                                                                                                                                                    |
| 2CU1  | GSSGSSGDVRVKFEHRGEKRIQLQFPRVKLEDLRSKAKIAFGQSMDLHYTNNELVIPLTT<br>QDDLDKAVELLDRSIHMKSLKILLVINGSTQATNLEPSGSSG                                                                                                                                                                                                                                                                                                                                                                                                                                                                                                                                                                                                                                                                                                                                                                                                                                                                                                                                                                                                                                                                          |
| 3CQW  | GAMDPRVTMNEFEYLKLLGKGTFGKVLVKEKATGRYYAMKILKEVIVAKDEVAHTL<br>TENRVLQNSRHPFLTALKYSFQTHDRLCFVMEYANGGELFFHLSRERVFSEDRARFYG<br>AEIVSALDYHSEKNVYRDLKLENLMLDKDGHIKITDFGLCKEGIKDGATMKTFCGT<br>PEYLAPEVLEDNDYGRAVDWWGLGVVYEMMCGRLPFYNQDHEKLFELILMEEIRFP<br>RTLGPESLGLLKKDPKQRLGGSEDAKIMQHRFFAGIVWQHVVYEKLSPPFKP<br>QVTSETDTRYFDEEFTAQMITITPPDQDDSMCEVDSERRPHFPQFDYSASSTA                                                                                                                                                                                                                                                                                                                                                                                                                                                                                                                                                                                                                                                                                                                                                                                                                     |
| 3M06  | sELLQRCEsLEKKTATFENIVCVLNREVERVAMTAEACSRQHRLDQDKIEALSSKVQQL<br>ERSIglehhhhh                                                                                                                                                                                                                                                                                                                                                                                                                                                                                                                                                                                                                                                                                                                                                                                                                                                                                                                                                                                                                                                                                                         |
| 121P  | MTEYKLVVVGAGGVGKSALTIQLIQNHFVDEYDPTIEDSYRKQVVIDGETCLLDILDTA<br>GQEEYSAMRDQYMRTEGEGFLCVFAINNTKSFEDIHQYREQIKRVKDSDDVPMVLVGN<br>KCDLAARTVESRQAQDLARSYGIPYIETSAKTRQGVEDAFYTLVREIRQH<br>MQSDVRIKFEHNGERRIIAFSRPVKYEDVEHKVTTVFGQPLDLHYMNNELSILLKNQDD<br>LDKAIDILDRSSSMKSLRILLLSQDRNLEHHHHHH                                                                                                                                                                                                                                                                                                                                                                                                                                                                                                                                                                                                                                                                                                                                                                                                                                                                                               |

**Table S2.** The active site residues, pocket volume and surface area of molecular targets were predicted using CASTp server.

| <b>Protein</b> | <b>PDB ID</b> | <b>Active site residues</b>                                                                                                                                                                                                             | <b>Surface Area (SA)</b> | <b>Volume (SA)</b> |
|----------------|---------------|-----------------------------------------------------------------------------------------------------------------------------------------------------------------------------------------------------------------------------------------|--------------------------|--------------------|
| PKC- $\eta$    | 3TXO          | Leu361, Gly362, Lys363, Ser365, Phe366, Gly367, Lys368, Val369, Ala382, Lys384, Val385, Ile391, Asp394, Asp396, Cys399, Thr400, Glu403, Leu407, Thr417, Arg428, Phe431, Mrt433, Glu434, Phe435, Val436                                  | 843.6                    | 910.5              |
| HRas-P21       | 121P          | Gly12, Gly13, Val14, Gly15, Lys16, Ser17, Ala18, Phe28, Val29, Asp30, Glu31, Tyr32, Thr35, Try40, Asp57, Thr58, Ala59, Gly60, Gln61, Asn116, Lys117, Asp119, Leu120, Ser145, Ala146, Lys147                                             | 336.6                    | 224.3              |
| AKT-1          | 3CQW          | Phe161, Gly162, Lys163, Val164, Arg174, Lys179, Leu181, Glu191, His194, Thr195, Glu198, Leu202, Thr211, Met227, Glu228, Tyr229, E234, Met281, Thr312, His354, Lys419, Glu432, Phe438, Phe442                                            | 828.6                    | 602.9              |
| Ras            | 1LFD          | Ala211, Gly212, Lys216, Try232, His227, Phe228, Asp230, Tyr232, Thr235, Gln261, Asn285, Lys288, Tyr296, Asn316, Lys317, Asp319, Ala346, Lys347,                                                                                         | 951.7                    | 593.8              |
| PI3K- $\alpha$ | 4A55          | Ala533, Cys53z5, Thr536, Ser541, Glu563, Lys594, Glu596, Gln507, Asp625, Lys627, Ser629, Gln630, Tyr631, Arg662, His665, Phe666, Leu752, Asn756, Met772, Pro778, Trp780, Leu793, Ile800, Lys802, Val850, Val851, Try836, Ile932, Asp933 | 2703.0                   | 2736.6             |
| MEKK3          | 2PPH          | Asp41, Tyr44, Asn46, Leu49, Ser50, Ile51, Leu52, Lys54, Asn55, Asp57, Asp58, Lys61, Ala62, Ile65, Leu66,                                                                                                                                | 332.6                    | 484.8              |

|          |      |                                                                                                                                                                                                                                  |       |        |
|----------|------|----------------------------------------------------------------------------------------------------------------------------------------------------------------------------------------------------------------------------------|-------|--------|
|          |      | Met72, Gln82, Asn85, His90, His91,<br>His92, His93                                                                                                                                                                               |       |        |
| NFκB-P52 | 1A3Q | Glu92, Asp94, Leu95, Arg103, Ala104,<br>His105, His107, Ser108, Ile117, Gly118,<br>Ile119, Lys153, Leu154, Arg156,<br>Gln157, Arg160, Ser161, Arg193,<br>Ser195, Phe197, Ser206                                                  | 283.1 | 327.4  |
| MEKK2b   | 2CU1 | Leu30, Glu31, Arg34, Ser35, Ala37,<br>Lys38, Ser44, Met45, Asp46, Leu47,<br>Leu58, Thr59, Thr60, Gln61, Asp62,<br>Asn87, Ser89, Thr90, Gln91, Ala92,<br>Thr93, Asn94, Leu95, Ser98, Pro100                                       | 451.3 | 609.2  |
| TRAF2    | 3M06 | Glu267, Gln270, Arg271, Lys277,<br>Thr281, Phe282, Thr341, Phe344,<br>Glu400, Thr403, Phe406, Val410,<br>Cys411, Glu521, Glu524, Lys525,<br>Thr527, Glu577, Gln580, Arg581,<br>Ser584, Leu585, Lys587, Lys588,<br>Thr591, Phe592 | 662.4 | 1051.0 |

**Table S3.** The binding interactions, distance, angle and binding energy of the lead compounds with cancer drug targets.

| Dietary Compounds | Protein       | Binding Interactions | Distance (Å)     | Angle (°) | Atoms involved in Angle | Binding energy ΔG kcal/mol |       |
|-------------------|---------------|----------------------|------------------|-----------|-------------------------|----------------------------|-------|
| Silibinin         | H-Ras         | Lys117-----CO        | 2.4              | 126.0     | O-H-CO                  | -11.6                      |       |
|                   |               | Phe28-----CO         | 4.0              | 126.8     | N-H-OH                  |                            |       |
|                   |               | Ser17-----CO         | 3.7              | 143.1     | C-O-OH                  |                            |       |
|                   |               | Asp119-----CO        | 3.0              | 164.6     | N-H-CO                  |                            |       |
|                   |               | Asp119-----CO        | 3.2              | 126.7     | O-H-OH                  |                            |       |
|                   |               | Lys16-----CO         | 3.8              | 136.7     | C-H-OH                  |                            |       |
|                   | RAS           | Phe228-----OH        | 3.9              | 135.2     | C-H-OH                  | -10.2                      |       |
|                   |               | Lys317-----OC        | 4.5              | 117.7     | N-H-OH                  |                            |       |
|                   |               | Gly213-----OH        | 3.9              | 107.7     | C-O-OH                  |                            |       |
|                   |               | Gly213-----OH        | 3.9              | 152.0     | O-O-OH                  |                            |       |
|                   |               | Thr235-----OC        | 3.2              | 171.5     | N-H-OH                  |                            |       |
|                   |               | Tyr232-----OC        | 4.8              | 189.9     | O-H-OH                  |                            |       |
|                   | PKC           | Asp440-----CO        | 3.6              | 108.8     | C-O-OH                  | -10.0                      |       |
|                   |               | Asp497-----CO        | 4.2              | 121.5     | N-H-CO                  |                            |       |
|                   |               | Leu486-----SO        | 4.3              | 135.6     | O-H-OH                  |                            |       |
|                   |               | Val436-----SO        | 3.0              | 98.7      | C-H-OH                  |                            |       |
|                   | PI3K          | Trp780-----OC        | 3.4              | 125.4     | N-O-OH                  | -9.3                       |       |
|                   |               | Tyr836-----OC        | 3.8              | 122.5     | C-O-OH                  |                            |       |
|                   |               | Tyr836-----OC        | 2.8              | 109.7     | N-H-OH                  |                            |       |
|                   |               | Ile932-----OC        | 3.4              | 113.1     | O-H-CO                  |                            |       |
|                   |               | Lys802-----OC        | 3.7              | 123.2     | C-H-OH                  |                            |       |
|                   |               | Met772-----OH        | 3.5              | 95.7      | N-H-OH                  |                            |       |
|                   |               | Met772-----OH        | 4.0              | 102.7     | C-O-OH                  |                            |       |
|                   | Flavopiridol  | PKC                  | Val369-----OC    | 3.1       | 64.6                    | N-H-OH                     | -10.5 |
|                   |               |                      | Leu486-----Cl    | 4.1       | 130.9                   | C-O-NC                     |       |
|                   |               |                      | Asp440-----NC    | 3.7       | 113.1                   | N-H-OH                     |       |
|                   |               |                      | Asp497-----OC    | 3.8       | 123.2                   | C-O-OH                     |       |
|                   |               | PI3K                 | Trp780-----arene | 3.6       | 90.3                    | C-O-HO                     | -9.2  |
| Tyr836-----arene  |               |                      | 3.6              | 121.0     | N-H-OH                  |                            |       |
| Tyr836-----OC     |               |                      | 2.8              | 120.0     | C-H-OH                  |                            |       |
| Ile932-----OC     |               |                      | 3.6              | 113.1     | O-H-CO                  |                            |       |
| Asp933-----OC     |               |                      | 2.8              | 123.2     | N-H-OH                  |                            |       |
| Met772-----OC     |               |                      | 3.7              | 95.7      | H-H-OH                  |                            |       |
| RAS               |               | Asp391-----Cl25      | 3.5              | 140.1     | N-H-CO                  | -9.0                       |       |
|                   |               | Phe228-----arene     | 4.0              | 113.1     | C-H-OH                  |                            |       |
|                   |               | Tyr323-----OC        | 3.7              | 123.2     | N-H-OH                  |                            |       |
|                   | Lys317-----OH | 3.2                  | 95.7             | O-H-OH    |                         |                            |       |
|                   | Ala218-----ON | 4.3                  | 102.7            | C-O-OH    |                         |                            |       |
| Oleandrin         | PI3K          | Trp780-----arene     | 2.9              | 90.1      | N-H-OC                  | -10.0                      |       |
|                   |               | Val850-----HC        | 3.5              | 128.0     | C-H-OH                  |                            |       |
|                   |               | Tyr836-----arene     | 3.1              | 108.5     | N-H-CO                  |                            |       |
|                   |               | Ile932-----OC        | 2.9              | 85.5      | O-H-OH                  |                            |       |
|                   |               | Ile932-----OC        | 3.6              | 111.5     | N-H-OH                  |                            |       |

|                          |               |                   |       |        |        |       |
|--------------------------|---------------|-------------------|-------|--------|--------|-------|
|                          | RAS           | Phe228-----OH     | 3.8   | 128.5  | H-N-OH | -9.7  |
|                          |               | Ala218-----OC     | 4.4   | 132.1  | H-N-OH |       |
|                          |               | Ser217-----OC     | 4.1   | 132.4  | C-O-OH |       |
|                          | PKC           | Leu486-----OH     | 3.6   | 111.4  | C-O-HC | -9.2  |
|                          |               | Val436-----OC     | 3.0   | 102.2  | O-C-OC |       |
|                          |               | Ala382-----OC     | 3.4   | 117.5  | N-H-OH |       |
|                          |               | Val369-----HC     | 3.8   | 149.3  | O-C-OC |       |
| $\alpha$ -Boswellic acid | PI3K          | Trp780----- Arene | 3.3   | 124.9  | N-H-OH | -10.2 |
|                          |               | Ile932-----CO     | 3.7   | 101.2  | C-O-OH |       |
|                          |               | Met772-----OH     | 3.6   | 164.4  | N-H-OH |       |
|                          |               | Lys802-----HC     | 3.4   | 156.7  | N-C-OH |       |
| RAS                      | Lys317-----CH | 3.4               | 112.4 | C-H-OC | -9.1   |       |
|                          | Phe228-----CH | 3.5               | 131.6 | O-C-OH |        |       |
|                          | Ser217-----OH | 3.2               | 98.1  | C-O-OC |        |       |
|                          | Tyr232-----OH | 3.7               | 103.1 | N-H-OH |        |       |
| $\beta$ -Boswellic acid  | PI3K          | Trp780-----Arene  | 3.5   | 109.8  | N-H-OH | -9.0  |
|                          |               | Tyr836-----CH     | 3.9   | 103.0  | C-O-OH |       |
|                          |               | Met772-----OH     | 4.5   | 116.3  | C-N-OH |       |
| Triterpenoid             | PI3K          | Trp780----- OC    | 4.3   | 138.3  | C-N-OC | -10.6 |
|                          |               | Val851-----OC     | 3.8   | 103.1  | H-C-OH |       |
|                          |               | Tyr836-----CH     | 2.8   | 92.3   | C-O-HO |       |
| Guggulesterone           | PI3K          | Tyr836-----CH     | 3.8   | 113.1  | N-H-OH | -10.0 |
|                          |               | Trp780----- OC    | 4.0   | 123.2  | H-O-CO |       |
|                          |               | Ile800----- OC    | 3.3   | 95.7   | C-H-OH |       |
|                          |               | Met772----- OC    | 3.9   | 102.7  | N-C-OC |       |
| Ursolic acid             | PI3K          | Tyr836-----CH     | 2.9   | 106.2  | C-O-OH | -9.0  |
|                          |               | Trp780----- OC    | 3.4   | 109.6  | N-H-OC |       |
|                          |               | Met772----- OC    | 4.5   | 162.8  | N-C-NH |       |
|                          | PKC           | Val369-----OC     | 3.2   | 122.1  | O-H-CH | -10.4 |
|                          |               | Leu486-----HC     | 4.2   | 118.1  | C-N-OH |       |
|                          | Asp497-----OC | 2.9               | 123.5 | N-H-OC |        |       |
| Oleanolic acid           | PI3K          | Ile932-----OC     | 3.6   | 84.0   | N-C-OH | -9.0  |
|                          |               | Trp780-----HC     | 3.4   | 113.1  | O-H-CO |       |
|                          |               | Asp933----- HC    | 3.9   | 123.2  | N-O-OH |       |
|                          |               | Asp933----- HC    | 3.3   | 95.7   | C-H-OH |       |
| Emodin                   | PKC           | Lys834-----OC     | 4.1   | 122.4  | O-H-OH | -9.1  |
|                          |               | Leu486-----OH     | 3.0   | 113.1  | C-H-CO |       |
|                          |               | Val436-----OC     | 4.0   | 123.2  | N-H-CH |       |
|                          |               | Val369-----OC     | 3.7   | 95.7   | N-H-OH |       |
|                          |               | Val369-----OC     | 3.9   | 102.7  | C-O-OH |       |
| Ellagic acid             | PKC           | Lys834-----OC     | 5.0   | 144.6  | C-O-HO | -9.4  |
|                          |               | Asp497-----OH     | 3.2   | 113.9  | N-H-OC |       |
|                          |               | Val436-----OC     | 3.8   | 141.0  | N-H-HO |       |
|                          |               | Ala382-----OC     | 3.5   | 161.5  | C-O-HO |       |
|                          |               | Val369-----OC     | 4.3   | 143.6  | N-H-CO |       |



**Table S4.** 2D structures, binding energy, binding affinity, MM/GBVI, efficiency and Lipinski rule of the best lead molecules of PI3K- $\alpha$ .

| S. No | Structure                                                                           | Binding energy (kcal/mol) | Binding affinity (pKi) | MM/GBVI (kcal/mol) | Efficiency | MW    | logP | TPSA | Don | Acc |
|-------|-------------------------------------------------------------------------------------|---------------------------|------------------------|--------------------|------------|-------|------|------|-----|-----|
| 1     | 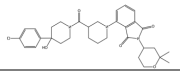   | -10.0                     | 5.7                    | -21.0              | 0.141      | 580.1 | 4.9  | 90.0 | 1   | 5   |
| 2     |    | -9.2                      | 4.6                    | -14.8              | 0.113      | 580.1 | 4.9  | 90.3 | 1   | 5   |
| 3     |    | -9.0                      | 6.3                    | -20.3              | 0.171      | 497.6 | 5.0  | 55.8 | 2   | 3   |
| 4     |    | -8.9                      | 5.2                    | -14.0              | 0.133      | 529.6 | 4.6  | 84.3 | 1   | 6   |
| 5     |    | -8.9                      | 6.2                    | -10.7              | 0.195      | 450.9 | 5.8  | 61.8 | 2   | 4   |
| 6     |  | -8.7                      | 7.3                    | -23.6              | 0.216      | 465.5 | 4.1  | 75.1 | 1   | 6   |
| 7     |  | -8.6                      | 5.5                    | -15.4              | 0.190      | 391.4 | 3.8  | 89.7 | 3   | 6   |

8

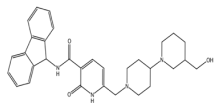

-8.5

5.4

-20.4

0.144

512.6

3.0

84.9

3

5

9

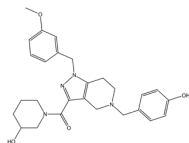

-8.5

5.7

-16.6

0.164

476.5

3.6

91.0

2

6

10

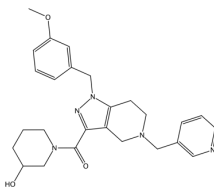

-8.5

7.2

-20.9

0.194

461.5

3.2

83.7

1

6

**Table S5.** 2D structures, binding energy, binding affinity, MM/GBVI, efficiency and Lipinski rule of five of five of the best lead molecules of PKC- $\eta$ .

| S. No | Structure                                                                           | Binding energy (kcal/mol) | Binding affinity (pKi) | MM/GBVI (kcal/mol) | Efficiency | MW  | logP | TPSA  | Don | Acc |
|-------|-------------------------------------------------------------------------------------|---------------------------|------------------------|--------------------|------------|-----|------|-------|-----|-----|
| 1     | 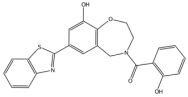   | -11.9                     | 8.7                    | -31.8              | 0.292      | 418 | 4.6  | 82.8  | 2   | 5   |
| 2     |    | -10.5                     | 9.6                    | -11.0              | 0.333      | 411 | 2.6  | 83.9  | 2   | 6   |
| 3     |    | -10.4                     | 8.7                    | -31.8              | 0.292      | 418 | 4.6  | 82.8  | 2   | 5   |
| 4     |  | -9.9                      | 10.0                   | -21.0              | 0.358      | 395 | 3.5  | 88.6  | 2   | 5   |
| 5     |  | -9.4                      | 9.1                    | -24.7              | 0.317      | 392 | 3.4  | 103.1 | 3   | 6   |

|    |                                                                                    |      |      |       |       |     |     |      |   |   |
|----|------------------------------------------------------------------------------------|------|------|-------|-------|-----|-----|------|---|---|
| 6  | 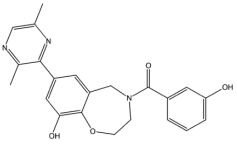  | -9.4 | 7.9  | -22.1 | 0.274 | 391 | 3.4 | 95.7 | 2 | 6 |
| 7  |   | -9.4 | 10.6 | -27.2 | 0.356 | 404 | 2.7 | 89.7 | 2 | 5 |
| 8  |   | -9.3 | 8.0  | -21.1 | 0.277 | 392 | 4.4 | 75.0 | 2 | 6 |
| 9  |  | -9.3 | 8.6  | -21.6 | 0.320 | 389 | 1.8 | 94.9 | 3 | 6 |
| 10 |                                                                                    | -9.2 | 6.7  | -29.0 | 0.234 | 399 | 3.8 | 62.1 | 2 | 5 |

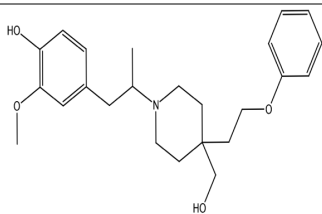

11

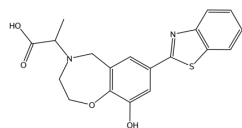

-9.1

9.0

-14.6

0.349

370.4

3.6

82.8

2

6

12

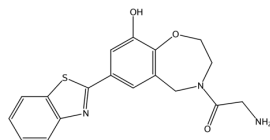

-8.9

8.9

-17.7

0.357

355.4

2.6

88.6

2

5

13

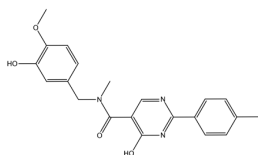

-8.9

8.8

-15.2

0.316

379

3.4

95.7

2

6
